# Supplementary material
Source: publisher site journal article supplement (https://www.dovepress.com/article/385911)
Supplement: Supplementary file 1 [file get_supplementary_file.php]

**Supplement 1, Table S1.1 Themes and subthemes emerging from patient priorities (heart failure treatment burden)**

| Theme                                   | Subtheme                                                                  | Quotes from participants                                                                                                                                                                                                                                            |
|-----------------------------------------|---------------------------------------------------------------------------|---------------------------------------------------------------------------------------------------------------------------------------------------------------------------------------------------------------------------------------------------------------------|
| <b>1P. Patient-doctor Communication</b> | <b>1.a. Clinicians' lack of empathy communicating with patient/family</b> | Communication needs to reflect patient circumstances (deafness) and be less technical (jargon & fast); Bedside manner on telephone consultation not too empathetic (communication, arrogance, dismissiveness, speak to like people)                                 |
|                                         |                                                                           | Communication of information on support services available post-discharge (gym, physio, getting to appointments after hours, discussing condition with other patients) ; Communication to family on impact of illness and treatment, include them for understanding |
|                                         |                                                                           | Would like to be taken seriously when patient makes suggestions. Respect patient's knowledge of their own chronic illness and treatment preferences                                                                                                                 |
|                                         |                                                                           | Language barriers (foreign accents) getting embarrassed asking again if patient doesn't understand                                                                                                                                                                  |
|                                         | <b>1.b. Loss agency due to information gap on medications</b>             | Insufficient explanation of why new medication is started or why a specific dosage is chosen (only explanation "It is good for your heart" is insufficient), for example patient does not understand why they need a blood thinner                                  |
|                                         |                                                                           | Would like explanation for medication purpose including side effects and medications and interactions                                                                                                                                                               |
|                                         |                                                                           | Not knowing types of medication patient is on and what they're for; needing to take a partner to understand/remember about medications; large number of medications                                                                                                 |
|                                         |                                                                           | Understanding Medication side effects and inability for changing medication type (not being in control)                                                                                                                                                             |
|                                         |                                                                           | Not knowing the medication patient has been prescribed (too many meds) or what they are for, and for how long (lifetime); Dr to know of patient allergies and needing to find correct medication                                                                    |
|                                         | <b>1.c. Disease trajectory</b>                                            | Limited understanding of own disease: Patient wanting to know more about the condition itself to be reassured and more knowledgeable of what to expect about disease trajectory                                                                                     |
|                                         |                                                                           | Lacks education/ information on condition, why disease is irreversible, impact of limitations                                                                                                                                                                       |
|                                         |                                                                           | Wished for better information about tests, limitations (impact on what can and cannot be done)                                                                                                                                                                      |

| Theme                                          | Subtheme                                                                         | Quotes from participants                                                                                                                                                                                                                                                                                                                                                                         |
|------------------------------------------------|----------------------------------------------------------------------------------|--------------------------------------------------------------------------------------------------------------------------------------------------------------------------------------------------------------------------------------------------------------------------------------------------------------------------------------------------------------------------------------------------|
|                                                | <b>1.d. Discharge planning</b>                                                   | Insufficient communication during hospitalisation (about changes in medication, discharge planning)                                                                                                                                                                                                                                                                                              |
|                                                | <b>1.e. Prognosis</b>                                                            | Patients not understanding disease process and not association between symptoms and prognosis or risk factor and outcomes e.g. smoking and heart attack (pt health literacy)                                                                                                                                                                                                                     |
| <b>2P. Inefficiencies of healthcare system</b> | <b>2.a. System communication failures between hospitals and general practice</b> | Poor communication between hospitals and GPs (re. medications, what's going on, test result, defib) results in loss of faith in clinicians; Conflicting information from different doctors (e.g. diuretics and weight gain)                                                                                                                                                                      |
|                                                |                                                                                  | Need better coordination between hospital, GP, & other doctors no disconnect                                                                                                                                                                                                                                                                                                                     |
|                                                | <b>2.b. Poor communication amongst clinicians in the same service</b>            | Trainee doctors changing medications without consultation with specialists or supervisors                                                                                                                                                                                                                                                                                                        |
|                                                |                                                                                  | Fragmented care of heart failure between GP, general physicians and cardiologist (other hospital specialist)                                                                                                                                                                                                                                                                                     |
|                                                |                                                                                  | Systems failure: burdensome having to repeat the same personal information at all appointments, e.g. what medication patient is on. Would like different clinicians/services to be able to access information                                                                                                                                                                                    |
|                                                |                                                                                  | Between-Doctors communication: Specialist unavailable when patient in the emergency department with a complication - patient needs fluids and puts on weight- Renal and CVD specialist giving conflicting advice (one Clinician wants patient to restrict fluid and the other wants more fluid). Also contradictions about medications -This makes it difficult for patient to manage condition. |
|                                                | <b>2.c. Low specialist numbers and sparse appointments</b>                       | Delays on regular appointment with specialist; even every 12 months would be reassuring, to clarify symptom (waiting list, or COVID-related)                                                                                                                                                                                                                                                     |
|                                                | <b>2.d. Multiple laboratory tests and delays in results</b>                      | Frequent blood tests (to monitor disease), long waiting times for tests to be done and to see a doctor to find out results                                                                                                                                                                                                                                                                       |
|                                                |                                                                                  | Poor availability of information between providers about ordered tests, clinician not having results of previous/recent test and patient having to repeat blood or urine tests                                                                                                                                                                                                                   |

| Theme                                                | Subtheme                                             | Quotes from participants                                                                                                                                                                                                                                                                                  |
|------------------------------------------------------|------------------------------------------------------|-----------------------------------------------------------------------------------------------------------------------------------------------------------------------------------------------------------------------------------------------------------------------------------------------------------|
|                                                      | <b>2.e. Inefficiencies in the ED</b>                 | Long waiting times in ED after having tests; prefers cardiologist to OK patient after observation, not the ED; Waiting times for treatments GP/cardiologists/ public & private                                                                                                                            |
| <b>3P. Healthcare Access</b>                         | <b>3.a. hospital location limits care continuity</b> | Ambulance taking patient to a hospital far away from patient residence (be able to see Dr near own place where clinical record is) continuity                                                                                                                                                             |
|                                                      | <b>3.b. Not knowing how to choose specialists</b>    | Finding the right heart specialist (unaware of how to go about it, including GP not knowing)                                                                                                                                                                                                              |
| <b>4P. Cost implications of treatment</b>            | <b>4.a. Implications for travel insurance</b>        | Challenge of obtaining travel insurance (part of patient's prior lifestyle)- Need more information or update on current health status to fill up conditions for eligibility/activities allowed for travel insurance                                                                                       |
|                                                      | <b>4.b. Lack of guidance on subsidies</b>            | Helpful to have someone at GP surgery to give guidance on recovering cost of medications, cheaper pharmacies, and patient entitlements such as safety net                                                                                                                                                 |
|                                                      | <b>4.c. Non-rational scheduling of appointments</b>  | Large number of appointments, would like to streamline on same day, reduce inconvenience of travel and cost                                                                                                                                                                                               |
| <b>5P. Psychosocial impact on patient and family</b> | <b>5.a. Impact on personal activities</b>            | Patient comorbidities (renal & heart) - makes it difficult to plan social life due to multiple hospital appointments and need to wait for test results; it impacts patient's and interferes with other relatives' lifestyle                                                                               |
|                                                      | <b>5.b. Impact on work</b>                           | Inability to go to work due to appointments, surgical procedures and symptoms; limitations of everyday duties (i.e. gardening) and caring responsibilities for children                                                                                                                                   |
|                                                      | <b>5.c. Impact on family's social life</b>           | Needing family help at home for usual chores because of the condition and associated procedures that have limited patient physical abilities; possible impact on family eventually as family drives patient to appointments; and stress about whether an ambulance or another emergency visit is required |
|                                                      |                                                      | Feeling guilty about having relative driving patient to hospital too early to reduce waiting time; interrupting their flow                                                                                                                                                                                |

| Theme                               | Subtheme                                                                             | Quotes from participants                                                                                                                                                                                                                                       |
|-------------------------------------|--------------------------------------------------------------------------------------|----------------------------------------------------------------------------------------------------------------------------------------------------------------------------------------------------------------------------------------------------------------|
|                                     | <b>5.d. Restrictions on patient lifestyle impact on quality of life</b>              | Fluid restriction diet and CPAP machine which makes patient thirsty; getting up to drink and go to toilet in the middle of the night and having poor quality sleep and tired through the day- Has ruined his quality of life                                   |
| <b>6P. Impact of treatment work</b> | <b>6.a. Burdensome medication regime</b>                                             | Medication adherence including pill burden (number of medications), complexity of regime (Time sensitive, time critical medication)                                                                                                                            |
|                                     | <b>6.b. Side effects discourage compliance</b>                                       | Side effects e.g. diuretics leading to increased need to go to the bathroom and people may not take medications, impact on socialisation, ADLs, interrupted sleep, falls risks from hypotension                                                                |
|                                     | <b>6.c. Symptoms preclude implementation</b>                                         | Challenge of implementing Rx recommendations: Weight precludes patient from doing recommended exercise; physiotherapist gives instructions but symptoms preclude; need to plan when exercising outdoors (knowing where to stop/site, where public toilets are) |
|                                     | <b>6.d. Challenging dietary demands to adhere and monitor in and out of hospital</b> | Adhering to nutritional and dietary advice e.g. asking patients to measure fluid intake, salt intake<br><br>Dietary changes and weight loss are challenging in hospital and at home                                                                            |

**Supplement 1, Table S1.2 Themes and subthemes emerging from doctors' perception of patient burden (heart failure)**

| Theme                                          | Subtheme                                                   | Issues raised by participating doctors                                                                                                                                                          |
|------------------------------------------------|------------------------------------------------------------|-------------------------------------------------------------------------------------------------------------------------------------------------------------------------------------------------|
| <b>1D. Impact of treatment work</b>            | <b>1.a. Complexity of medication and laboratory regime</b> | Medication adherence: pill burden (number of medications), complexity of regime (Time sensitive, time critical medication)                                                                      |
|                                                |                                                            | Side effects e.g. diuretics leading to increased need to go to the bathroom and people may not take medications, impact on socialisation, ADLs, interrupted sleep, falls risks from hypotension |
|                                                |                                                            | Additional work/testing from blood thinners and potential adverse events from blood thinners                                                                                                    |
|                                                |                                                            | Clinical inertia - physicians not taking action or keeping status quo i.e. ACE inhibitor/not up titrating and inappropriate prescribing e.g. NSAIDs, opioids                                    |
|                                                | <b>1.b. Adhering to restrictions</b>                       | Burden of adhering to nutritional and dietary advice e.g. asking patients to measure fluid intake, salt intake                                                                                  |
| <b>2D. Patient-doctor communication</b>        | <b>2.a. Clinician interactions</b>                         | Fragmented care of heart failure between GP, general physicians and cardiologist (other hospital specialist)                                                                                    |
|                                                |                                                            | Absence of multidisciplinary approach around health education and health promotion, unclear whose responsibility this is e.g. is it the GP, general physician                                   |
|                                                | <b>2.b. disconnect on progression</b>                      | Patients not understanding disease process and not association between symptoms and prognosis or risk factor and outcomes e.g. smoking and heart attack                                         |
| <b>3D. Inefficiencies of healthcare system</b> | <b>3.a. Repeat encounters</b>                              | Multiple hospitalisations and long length of stay                                                                                                                                               |
|                                                |                                                            | Ability to attend appointments either face to face or telehealth e.g. frailty, transport, memory, ability to use technology may result in missed appointments                                   |
|                                                |                                                            | Frequency and process (access) of undertaking blood tests                                                                                                                                       |
|                                                |                                                            | Need to undergo additional testing e.g Cardiac echo                                                                                                                                             |
| <b>4D. Psychosocial impact on patients</b>     | <b>4.a. emotional load of chronicity</b>                   | Acceptance/ coming to terms with chronic disease and having unrealistic expectations around the end of disease and symptom management, lose faith in doctors                                    |
|                                                |                                                            | Poor communication between patient and clinician can increase anxiety                                                                                                                           |
